# Supplementary material
Source: MDPI journal article supplement (https://www.mdpi.com/2673-9976/4/1/87)
Supplement: s1 [file s1]

# Nutrient Interactions in Natural Fortification of Tomato with Mg: An Analytical Perspective

**Ana Coelho<sup>1,2\*</sup>, Cláudia Pessoa<sup>1,2</sup>, Ana Marques<sup>1,2</sup>, Inês Luís<sup>1,2</sup>, Diana Daccak<sup>1,2</sup>, Maria Manuela Silva<sup>2,3</sup>,  
Manuela Simões<sup>1,2</sup>, Fernando Reboredo<sup>1,2</sup>, Maria Pessoa<sup>1,2</sup>, Paulo Legoinha<sup>1,2</sup>, Carlos Galhano<sup>1,2</sup>, José  
Ramalho<sup>2,4</sup>, Paula Scotti-Campos<sup>2,5</sup>, Isabel Pais<sup>2,5</sup> and Fernando Lidon<sup>1,2</sup>**

<sup>1</sup>Earth Sciences Department, Faculdade de Ciências e Tecnologia, Universidade Nova de Lisboa, Caparica, Portugal;

<sup>2</sup>GeoBioTec Research Center, Faculdade de Ciências e Tecnologia, Universidade Nova de Lisboa, Caparica, Portugal;

<sup>3</sup>ESEAG / Grupo Universidade Lusófona, Lisboa, Portugal;

<sup>4</sup>PlantStress & Biodiversity Lab, Centro de Estudos Florestais, Instituto Superior Agronomia, Universidade de Lisboa, Oeiras, Portugal;

<sup>5</sup>INIAV, Instituto Nacional de Investigação Agrária e Veterinária, Oeiras, Portugal.

\*Correspondence: [arf.coelho@campus.fct.unl.pt](mailto:arf.coelho@campus.fct.unl.pt)

**Abstract:** In the human body, about 53% of Mg is involved in the development and maintenance of bone and other calcified tissues, but it also has a physiological role in protein synthesis, muscle and nerve functions, blood glucose control and blood pressure regulation. Nevertheless, Mg deficiency triggers electrolyte disturbance that can result in multiple symptoms, namely tremor, poor coordination, muscle spasms, loss of appetite, personality changes, and nystagmus. Complications may include seizures or cardiac arrest. To surpass Mg deficiency, biofortification is a strategy that can boost nutrient enhancement in food crops and can increase nutrient uptake and accumulation in the human body. Accordingly, this study aimed to develop a technical itinerary for Mg biofortification in *Lycopersicon esculentum* variety H1534. Tomato biofortification was promoted during the respective life cycle throughout six leaf applications with two different treatments (4% and 8%) of  $\text{MgSO}_4$ , equivalent to 702 and 1404 g ha<sup>-1</sup>. At harvest, the biofortification index of Mg was 2.01 and 1.71 fold (after spraying with 4% and 8%  $\text{MgSO}_4$ , respectively), being found a synergistic trends only with Zn e Fe, whereas P did not varied significantly among treatments. Among treatments, relevant deviations could not be found for total soluble solids, height, diameter and color, yet minor changes in dry weight were detected. It is concluded that Mg biofortification of tomato variety H1534 can be carried out to add nutritional value to tomato based processed food products.

**Keywords:** *Lycopersicon esculentum* ; Mg Biofortification ; Nutrient interactions.

# Results and Discussion

**Table 1.** Mean values  $\pm$  S.E. (n = 4) of Mg, Zn, Fe, Ca, P and K in tomatoes of *Lycopersicum esculentum*, variety H1534, at harvest. Different letters (a, b) indicate significant differences, of each parameter, between treatments ( $P \leq 0.05$ ).

| Treatments           | Mg                | Zn                | Fe              | Ca                | P              | K              |
|----------------------|-------------------|-------------------|-----------------|-------------------|----------------|----------------|
|                      | mg/100g           |                   |                 |                   |                |                |
| Control              | 58.0b $\pm$ 5.8   | 1.43b $\pm$ 0.11  | 14.9b $\pm$ 0.3 | 36.6a,b $\pm$ 1.2 | 263a $\pm$ 1.5 | 2788a $\pm$ 94 |
| 4% MgSO <sub>4</sub> | 116.3a $\pm$ 14.7 | 2.57a $\pm$ 0.08  | 17.8a $\pm$ 0.3 | 31.8b $\pm$ 1.0   | 257a $\pm$ 5.8 | 2300b $\pm$ 49 |
| 8% MgSO <sub>4</sub> | 99.2ab $\pm$ 7.7  | 1.91ab $\pm$ 0.25 | 17.6a $\pm$ 0.0 | 38.5a $\pm$ 1.9   | 256a $\pm$ 1.7 | 2673a $\pm$ 64 |

Relatively to the control, treated tomatoes with 4% and 8 % of MgSO<sub>4</sub> showed an increasing contents of Mg (2.01 and 1.71 fold), Zn (1.80 and 1.34 fold) and Fe (1.20 and 1.18 fold), whereas Ca and K significantly lower values with 4% MgSO<sub>4</sub>. Moreover, P did not varied significantly among treatments.

## Conclusions

Through foliar spraying with MgSO<sub>4</sub>, Mg contents increased in the tomato variety H1534, being the maximum content obtained at a spray concentration of 4%. Zinc and Fe showed a synergistic pattern of accumulation with Mg. Additionally, Mg biofortification did not show relevant changes in total soluble solids, height, diameter and color. However, minor changes in dry weight occurred in the treatment that showed the highest content of Mg. Accordingly, agronomic biofortification of tomato variety H1534 can be applied to increase this nutrient in tomato based processed food products.

## Acknowledgments

The authors thanks to Eng. Valter Lopes and António Vasconcelos (Associação de Beneficiários do Roxo) for technical assistance in the agricultural parcel as well as to project PDR2020-101-030701 – for the financial support. We also thanks to the Research centres (GeoBioTec) UIDB/04035/2020, and (CEF) UIDB/00239/2020.

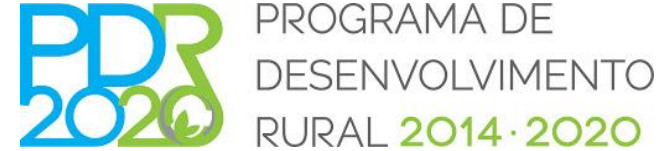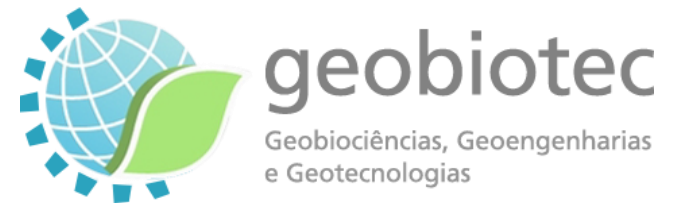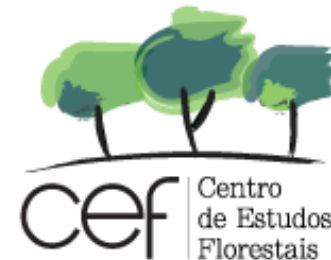

IECPS  
2020

The text 'IECPS 2020' is displayed in a bold, white sans-serif font on a solid green background.
